# Supplementary material for: Ribosome Profiling and RNA Sequencing Reveal Genome-Wide Cellular Translation and Transcription Regulation Under Osmotic Stress in Lactobacillus rhamnosus ATCC 53103
Source: Front Microbiol. 2021 Nov 25;12:781454. doi: 10.3389/fmicb.2021.781454 (PMC8656396; doi:10.3389/fmicb.2021.781454)
Supplement: Supplementary file 7 [file Table_3.XLSX]

## Sheet: Sheet1
Table S3 DEGs with differential translation efficiency regulation upon osmotic stress.
Note: FC, fold change; TE, translation efficiency.
Category	Gene_ID	Gene_name	TE_CG	TE_OS	log2FC	pvalue	FDR
Up-regulated TE	LGG_RS02170	--	0.01	1.34	7.07	0	0
	LGG_RS12930	--	0.01	0.71	6.15	5.44499e-05	0.000550855
	LGG_RS00115	--	0.01	0.69	6.11	0.00331289	0.01498
	LGG_RS01110	ywzA	0.15	7.62	5.67	9.23659e-06	0.000121904
	LGG_RS11495	--	0.13	3.73	4.84	0.00133044	0.00747113
	LGG_RS09440	--	0.56	14	4.64	0	0
	LGG_RS10285	--	0.36	8.79	4.61	3.06501e-06	4.74347e-05
	LGG_RS09645	--	3.95	91.86	4.54	0.0030857	0.0141539
	LGG_RS02745	--	0.04	0.88	4.46	0.00547429	0.02217
	LGG_RS12120	queT	0.13	2.6	4.32	0	0
	LGG_RS00820	--	0.01	0.19	4.25	6.9901e-11	3.7863e-09
	LGG_RS01770	thiE	0.51	8.86	4.12	0.000900813	0.00545947
	LGG_RS03110	--	0.22	3.6	4.03	0.000260965	0.0020015
	LGG_RS00580	--	0.3	4.76	3.99	1.80771e-07	4.05153e-06
	LGG_RS03070	lacF	1.59	25.23	3.99	2.6745e-06	4.24006e-05
	LGG_RS11520	--	0.12	1.85	3.95	3.21965e-14	3.6396e-12
	LGG_RS12515	--	0.07	1.03	3.88	2.72005e-14	3.2146e-12
	LGG_RS00595	--	0.05	0.73	3.87	0.0116067	0.0394477
	LGG_RS00220	--	0.16	2.23	3.8	8.30036e-06	0.000112401
	LGG_RS00890	--	0.07	0.95	3.76	2.25375e-14	2.79036e-12
	LGG_RS11020	--	0.44	5.89	3.74	7.23066e-12	5.22214e-10
	LGG_RS00180	--	0.12	1.58	3.72	2.10942e-15	3.20731e-13
	LGG_RS03170	HSP17.6C	0.01	0.13	3.7	0	0
	LGG_RS11625	--	0.12	1.49	3.63	0.0146786	0.0474093
	LGG_RS14685	--	0.5	6.11	3.61	7.91257e-08	1.95743e-06
	LGG_RS02065	MJ1651	0.5	5.75	3.52	0	0
	LGG_RS01980	fruA	0.1	1.11	3.47	0.00346356	0.01558
	LGG_RS08910	RP368	0.48	5.23	3.45	1.11022e-16	2.06184e-14
	LGG_RS10800	--	0.15	1.61	3.42	1.7667e-12	1.44699e-10
	LGG_RS00500	trpD	0.61	6.49	3.41	0.0134657	0.0442678
	LGG_RS05535	--	0.33	3.5	3.41	2.13515e-11	1.354e-09
	LGG_RS08130	--	2.01	21.43	3.41	3.80165e-09	1.37282e-07
	LGG_RS03675	dltC	0.31	3.27	3.4	0	0
	LGG_RS07015	lspA	0.22	2.2	3.32	0	0
	LGG_RS11680	msbA	0.15	1.48	3.3	1.11022e-16	2.06184e-14
	LGG_RS09250	citN	0.04	0.39	3.29	0.000839705	0.00517004
	LGG_RS12975	--	0.2	1.92	3.26	0.000962615	0.00567528
	LGG_RS06620	fmnP	0.24	2.27	3.24	0	0
	LGG_RS05550	--	0.33	3.09	3.23	0.0131349	0.0435595
	LGG_RS12130	--	0.09	0.81	3.17	1.66533e-15	2.70617e-13
	LGG_RS13465	glnP	0.02	0.16	3	1.30155e-09	5.37147e-08
	LGG_RS15195	--	0.28	2.23	2.99	0.0131809	0.0436564
	LGG_RS04135	MM_0082	0.97	7.65	2.98	4.94276e-08	1.36715e-06
	LGG_RS09240	bcc	0.19	1.44	2.92	0.00015612	0.00135756
	LGG_RS13735	--	0.59	4.47	2.92	5.12764e-07	1.04155e-05
	LGG_RS07195	yitW	0.27	2.03	2.91	9.10827e-13	8.77093e-11
	LGG_RS00245	--	0.25	1.85	2.89	9.10931e-08	2.15311e-06
	LGG_RS01000	--	0.24	1.76	2.87	6.14382e-05	0.000609692
	LGG_RS07005	pyrR1	0.15	1.1	2.87	5.61321e-08	1.52024e-06
	LGG_RS11025	rpmG2	0.13	0.95	2.87	5.87173e-08	1.57387e-06
	LGG_RS11425	comA	0.17	1.24	2.87	0.000247381	0.0019315
	LGG_RS14660	--	1.53	11.22	2.87	6.6025e-13	6.8666e-11
	LGG_RS10805	folT	0.55	3.93	2.84	2.66454e-15	3.64621e-13
	LGG_RS13580	--	0.12	0.86	2.84	7.99195e-07	1.50573e-05
	LGG_RS09495	--	0.1	0.71	2.83	4.04339e-05	0.000432627
	LGG_RS11560	--	0.09	0.64	2.83	6.97589e-05	0.000681854
	LGG_RS14270	--	0.1	0.71	2.83	0.00150752	0.00818277
	LGG_RS12205	--	1.75	12.15	2.8	1.38627e-09	5.63171e-08
	LGG_RS03240	RP368	0.32	2.21	2.79	1.58623e-09	6.34492e-08
	LGG_RS00995	--	0.1	0.66	2.72	0.00246902	0.0119321
	LGG_RS11675	spaT	0.21	1.37	2.71	7.68455e-11	4.07752e-09
	LGG_RS03750	--	0.24	1.54	2.68	7.99061e-08	1.95743e-06
	LGG_RS04935	--	0.05	0.32	2.68	3.68598e-09	1.34979e-07
	LGG_RS13900	--	3.52	22.56	2.68	7.1939e-09	2.39797e-07
	LGG_RS03010	ykpA	0.93	5.86	2.66	8.32667e-15	1.08247e-12
	LGG_RS05220	--	0.57	3.57	2.65	8.82395e-11	4.49849e-09
	LGG_RS00215	--	3.37	20.88	2.63	0.00404551	0.0175306
	LGG_RS01875	--	0.06	0.37	2.62	0.00399682	0.0173775
	LGG_RS02865	mtrA	0.23	1.41	2.62	4.18037e-10	1.8422e-08
	LGG_RS06490	artM	0.1	0.61	2.61	5.25054e-10	2.27523e-08
	LGG_RS02440	--	0.37	2.23	2.59	0.000406869	0.00288245
	LGG_RS06885	hisE	0.42	2.51	2.58	0.00587723	0.0235206
	LGG_RS07570	--	0.88	5.26	2.58	4.02956e-10	1.8333e-08
	LGG_RS13965	--	0.06	0.36	2.58	9.72731e-06	0.000127091
	LGG_RS12940	--	5.77	34.23	2.57	0.000841126	0.00517004
	LGG_RS02035	yhfU	1.17	6.85	2.55	1.68178e-05	0.000203378
	LGG_RS02595	ytrB	0.42	2.38	2.5	1.08696e-06	1.95855e-05
	LGG_RS07255	--	1.08	6.09	2.5	1.79838e-09	7.08454e-08
	LGG_RS04495	--	0.34	1.87	2.46	4.80246e-06	6.89855e-05
	LGG_RS13440	--	0.06	0.33	2.46	3.41263e-10	1.58443e-08
	LGG_RS00835	adeP	1.6	8.74	2.45	1.45806e-12	1.26365e-10
	LGG_RS02600	--	0.17	0.93	2.45	3.97316e-08	1.13519e-06
	LGG_RS04645	potA	3.58	19.36	2.44	3.29614e-12	2.59696e-10
	LGG_RS11570	--	0.09	0.49	2.44	0.000975288	0.00572404
	LGG_RS00845	--	0.4	2.15	2.43	0.000310308	0.00229205
	LGG_RS03420	--	0.27	1.44	2.42	0.000337507	0.00245117
	LGG_RS09835	rfbP	0.47	2.51	2.42	7.25859e-10	3.04392e-08
	LGG_RS13350	--	0.1	0.53	2.41	0.000972084	0.00571814
	LGG_RS01005	--	0.2	1.05	2.39	0.00259538	0.0124076
	LGG_RS04410	--	0.68	3.57	2.39	1.58561e-11	1.03065e-09
	LGG_RS07865	yheI	0.2	1.05	2.39	3.74385e-11	2.26372e-09
	LGG_RS09875	--	0.17	0.89	2.39	6.422e-10	2.73724e-08
	LGG_RS01350	--	0.6	3.12	2.38	3.4468e-12	2.63579e-10
	LGG_RS06485	yecS	0.05	0.26	2.38	1.06053e-06	1.92823e-05
	LGG_RS08865	--	0.09	0.47	2.38	1.45087e-07	3.33828e-06
	LGG_RS10055	--	0.48	2.5	2.38	1.99038e-06	3.23437e-05
	LGG_RS13645	--	0.2	1.04	2.38	2.20239e-05	0.000253373
	LGG_RS11740	ecfT	0.28	1.45	2.37	6.62443e-11	3.66458e-09
	LGG_RS04725	--	0.33	1.69	2.36	3.47893e-08	1.00502e-06
	LGG_RS01135	--	0.3	1.51	2.33	1.35051e-06	2.3566e-05
	LGG_RS01390	--	0.09	0.45	2.32	4.28169e-11	2.53009e-09
	LGG_RS01490	--	0.46	2.3	2.32	4.38741e-08	1.23992e-06
	LGG_RS04655	potC	0.57	2.84	2.32	1.03979e-06	1.90383e-05
	LGG_RS09865	murJ	0.18	0.9	2.32	2.76992e-10	1.33367e-08
	LGG_RS04775	--	0.65	3.15	2.28	1.62408e-10	7.96717e-09
	LGG_RS10310	gtcA	1.31	6.3	2.27	0.00058821	0.00390139
	LGG_RS06150	mraY	0.33	1.56	2.24	1.11181e-08	3.61337e-07
	LGG_RS08430	--	2.19	10.35	2.24	2.26337e-07	4.90398e-06
	LGG_RS13110	--	0.26	1.23	2.24	0.0018207	0.00948663
	LGG_RS11310	--	19.98	94.04	2.23	0.000458067	0.00319296
	LGG_RS09890	--	0.39	1.82	2.22	2.06346e-07	4.5466e-06
	LGG_RS03235	--	0.48	2.22	2.21	5.44728e-09	1.88839e-07
	LGG_RS04640	--	6.13	28.39	2.21	7.70824e-05	0.000742275
	LGG_RS04985	--	0.74	3.39	2.2	3.0149e-10	1.42522e-08
	LGG_RS09255	--	0.1	0.46	2.2	0.000109635	0.00100725
	LGG_RS10930	svop	0.09	0.41	2.19	0.00046501	0.00323269
	LGG_RS13590	--	0.27	1.23	2.19	0.000160405	0.00138556
	LGG_RS06740	--	0.19	0.86	2.18	0.00299326	0.0138478
	LGG_RS08145	pglK	0.06	0.27	2.17	8.89544e-06	0.000118606
	LGG_RS01855	Rv1250	0.09	0.4	2.15	1.66473e-06	2.79246e-05
	LGG_RS13795	--	0.35	1.54	2.14	9.32545e-07	1.71959e-05
	LGG_RS01065	--	0.33	1.44	2.13	1.19739e-05	0.000151864
	LGG_RS01060	--	0.18	0.78	2.12	1.84617e-09	7.16425e-08
	LGG_RS04060	yusP	0.2	0.87	2.12	8.33484e-08	2.00654e-06
	LGG_RS12195	--	0.19	0.82	2.11	0.00888638	0.0318245
	LGG_RS00110	--	6.75	28.68	2.09	0.00308665	0.0141539
	LGG_RS03815	yutG	0.14	0.59	2.08	4.66876e-05	0.000485551
	LGG_RS05185	glcU	0.26	1.09	2.07	2.41422e-09	9.23085e-08
	LGG_RS10615	ydeD	0.42	1.76	2.07	1.82319e-07	4.05153e-06
	LGG_RS06215	ribZ	0.33	1.38	2.06	5.91015e-07	1.18203e-05
	LGG_RS04650	potB	0.63	2.59	2.04	7.33303e-08	1.88771e-06
	LGG_RS08740	thiT	0.2	0.81	2.02	2.84161e-08	8.69199e-07
	LGG_RS02120	--	0.53	2.14	2.01	0.00167794	0.00886716
	LGG_RS11090	--	0.47	1.85	1.98	0.013045	0.0433721
	LGG_RS11330	proB	0.58	2.27	1.97	2.85134e-05	0.000319546
	LGG_RS06235	--	0.86	3.34	1.96	1.84632e-05	0.000218201
	LGG_RS02255	ygjI	0.15	0.58	1.95	0.00233789	0.0114258
	LGG_RS09225	citC	0.06	0.23	1.94	0.00803875	0.0296464
	LGG_RS02205	napA	0.2	0.76	1.93	3.35003e-06	5.03473e-05
	LGG_RS11400	--	2.67	10.18	1.93	0.0128124	0.0427224
	LGG_RS11800	rpmD	0.42	1.6	1.93	7.99663e-06	0.000108855
	LGG_RS01010	yybJ	0.23	0.87	1.92	0.00378724	0.0167463
	LGG_RS04535	--	1.17	4.42	1.92	8.28889e-07	1.53937e-05
	LGG_RS09370	--	0.76	2.88	1.92	0.00636116	0.0249081
	LGG_RS12520	--	0.56	2.12	1.92	0.00259606	0.0124076
	LGG_RS13955	--	0.48	1.82	1.92	8.63671e-06	0.000116349
	LGG_RS07965	acpP	0.86	3.24	1.91	0.000397782	0.00282577
	LGG_RS09600	--	0.69	2.59	1.91	2.33546e-08	7.22881e-07
	LGG_RS07450	--	0.15	0.56	1.9	6.87351e-05	0.000674383
	LGG_RS10115	--	1.06	3.95	1.9	5.58513e-07	1.12569e-05
	LGG_RS10735	groS	4.17	15.53	1.9	6.01413e-07	1.19364e-05
	LGG_RS03480	napA	0.2	0.74	1.89	4.84496e-08	1.35451e-06
	LGG_RS10065	--	0.2	0.74	1.89	0.00025267	0.00196102
	LGG_RS13470	argG	0.72	2.67	1.89	5.37096e-06	7.5894e-05
	LGG_RS06115	artP	0.2	0.73	1.87	0.000278237	0.00210909
	LGG_RS06525	rnz	0.41	1.5	1.87	6.00112e-08	1.59213e-06
	LGG_RS02040	yhfT	0.61	2.21	1.86	0.00664211	0.0255844
	LGG_RS02590	--	0.33	1.19	1.85	0.00163378	0.00866905
	LGG_RS04070	ycnB	0.36	1.3	1.85	7.38166e-07	1.4112e-05
	LGG_RS11755	--	0.33	1.19	1.85	0.000124807	0.00111129
	LGG_RS06095	minC	0.24	0.86	1.84	7.88732e-08	1.95743e-06
	LGG_RS09705	--	1.03	3.69	1.84	0.00533546	0.0217433
	LGG_RS00310	--	1.64	5.82	1.83	0.00576135	0.0231881
	LGG_RS00395	--	0.89	3.11	1.81	0.0103254	0.0360351
	LGG_RS04065	--	0.08	0.28	1.81	0.0141497	0.0461488
	LGG_RS06435	tuf	0.1	0.35	1.81	1.62536e-07	3.67473e-06
	LGG_RS09045	--	0.35	1.23	1.81	0.000218699	0.00174422
	LGG_RS00705	--	0.43	1.5	1.8	0.00269196	0.0127256
	LGG_RS05855	LJ_1825	0.25	0.87	1.8	4.3495e-07	9.11992e-06
	LGG_RS12710	--	0.37	1.29	1.8	1.44626e-05	0.000178213
	LGG_RS07240	glyQ	0.37	1.28	1.79	6.62725e-08	1.72309e-06
	LGG_RS08120	ysxB	0.11	0.38	1.79	7.92438e-08	1.95743e-06
	LGG_RS08595	argR1	0.11	0.38	1.79	1.09227e-06	1.95855e-05
	LGG_RS09850	rfbG	0.28	0.96	1.78	4.31778e-05	0.000458214
	LGG_RS00015	yaaA	1.63	5.56	1.77	0.000868881	0.00530355
	LGG_RS07445	cdd	0.36	1.22	1.76	1.32879e-06	2.33436e-05
	LGG_RS06585	LSEI_1366	0.29	0.97	1.74	0.000168732	0.00143367
	LGG_RS08100	yqhY	0.83	2.77	1.74	8.06277e-07	1.50814e-05
	LGG_RS09465	--	0.63	2.11	1.74	0.00108166	0.00624962
	LGG_RS10755	--	0.3	1	1.74	3.06474e-05	0.000341988
	LGG_RS11685	--	0.06	0.2	1.74	5.65056e-05	0.000569436
	LGG_RS12385	HX13_20290	0.09	0.3	1.74	0.000776124	0.00490979
	LGG_RS03245	phnC	0.33	1.09	1.72	0.000552314	0.00371064
	LGG_RS04140	LSEI_0897	0.69	2.28	1.72	5.57776e-06	7.79687e-05
	LGG_RS04090	murJ	0.11	0.36	1.71	2.87263e-06	4.52657e-05
	LGG_RS03475	--	0.5	1.63	1.7	9.78936e-05	0.000915551
	LGG_RS00085	cydA	0.31	1	1.69	0.00388262	0.0169946
	LGG_RS07540	--	0.78	2.51	1.69	1.47599e-05	0.000181018
	LGG_RS08735	purE	4.92	15.83	1.69	0.000192583	0.00158454
	LGG_RS06600	ribT	0.34	1.09	1.68	2.15201e-05	0.000248677
	LGG_RS07895	lmo1796	0.1	0.32	1.68	6.35666e-05	0.000628415
	LGG_RS08670	nrdG	0.25	0.8	1.68	0.000705586	0.0045409
	LGG_RS12965	--	0.33	1.05	1.67	0.013211	0.0437007
	LGG_RS02750	--	0.45	1.41	1.65	0.00327059	0.0148404
	LGG_RS10060	--	1.4	4.4	1.65	0.0005518	0.00371064
	LGG_RS10815	--	0.42	1.32	1.65	2.96391e-06	4.61447e-05
	LGG_RS10905	rplL	0.28	0.88	1.65	6.27993e-07	1.21849e-05
	LGG_RS05240	yobD	0.16	0.49	1.61	8.73425e-05	0.000825784
	LGG_RS07200	lp_1712	1.22	3.73	1.61	0.00550093	0.0222087
	LGG_RS13800	--	1.66	5.07	1.61	2.50144e-05	0.000285252
	LGG_RS14085	rnpA	0.2	0.61	1.61	3.41717e-05	0.000371743
	LGG_RS01345	gntP	0.38	1.15	1.6	0.0137837	0.0451355
	LGG_RS02990	amt	1.34	4.06	1.6	0.00386343	0.0169438
	LGG_RS12305	rnmV	1.04	3.16	1.6	4.33323e-06	6.3652e-05
	LGG_RS01365	--	0.17	0.51	1.58	1.25027e-05	0.000157039
	LGG_RS01620	manZ	0.07	0.21	1.58	0.000570731	0.00380487
	LGG_RS13120	tdh	0.68	2.03	1.58	0.00755989	0.0280796
	LGG_RS05590	MT1311	0.53	1.57	1.57	3.2037e-06	4.89977e-05
	LGG_RS08195	--	12.84	38.15	1.57	2.43903e-05	0.00027936
	LGG_RS09840	--	0.86	2.56	1.57	3.47583e-05	0.000374985
	LGG_RS13675	glnQ	0.25	0.74	1.57	0.000790742	0.00494391
	LGG_RS07455	ybeY	2.32	6.78	1.55	0.000791026	0.00494391
	LGG_RS10835	yaaQ	0.8	2.35	1.55	0.000101168	0.000939417
	LGG_RS04690	--	0.1	0.29	1.54	0.000492637	0.00338851
	LGG_RS10105	--	0.98	2.85	1.54	0.000985698	0.00575914
	LGG_RS01625	manX	0.29	0.84	1.53	0.000124128	0.00110905
	LGG_RS03275	ciaR	0.19	0.55	1.53	0.000319125	0.00234386
	LGG_RS12365	pip	0.66	1.9	1.53	4.00628e-06	5.91837e-05
	LGG_RS00600	--	1.28	3.68	1.52	0.00274908	0.0129486
	LGG_RS04310	ftsX	0.15	0.43	1.52	3.22551e-06	4.90429e-05
	LGG_RS09560	rhaD	0.38	1.09	1.52	0.00532164	0.021721
	LGG_RS12960	--	0.23	0.66	1.52	0.00604585	0.0239988
	LGG_RS06240	mtnN	0.46	1.31	1.51	6.75641e-05	0.000665404
	LGG_RS09775	yvjA	0.13	0.37	1.51	0.002431	0.0117934
	LGG_RS04340	yqgI	0.41	1.16	1.5	1.9673e-05	0.000231234
	LGG_RS10070	--	1.07	3.02	1.5	3.18251e-05	0.000353557
	LGG_RS04600	tsaE	0.44	1.24	1.49	0.000227492	0.00179781
	LGG_RS05705	--	0.38	1.06	1.48	0.000983937	0.00575914
	LGG_RS07000	pyrP	0.38	1.06	1.48	8.11233e-05	0.000776004
	LGG_RS10825	LCABL_24380	0.33	0.92	1.48	0.000924031	0.00552501
	LGG_RS04205	guaC	2.06	5.7	1.47	0.000105361	0.000971416
	LGG_RS04490	clcA	0.42	1.16	1.47	4.40943e-05	0.000462279
	LGG_RS08445	dnaI	0.26	0.72	1.47	0.000121333	0.00109158
	LGG_RS04505	--	0.04	0.11	1.46	0.000955187	0.00565714
	LGG_RS05150	pucK	0.51	1.4	1.46	9.05659e-06	0.000120138
	LGG_RS06125	--	0.16	0.44	1.46	0.00689867	0.0262614
	LGG_RS08530	ytpP	0.58	1.6	1.46	5.75963e-05	0.000578186
	LGG_RS09125	lysP	0.2	0.55	1.46	4.98362e-05	0.000516232
	LGG_RS10650	bioY	2.22	6.11	1.46	0.00160366	0.00852662
	LGG_RS01950	tkt	2.67	7.22	1.44	0.00267121	0.0126505
	LGG_RS02165	--	2.47	6.68	1.44	0.00594315	0.0236997
	LGG_RS04125	patB	1.98	5.35	1.43	1.84242e-05	0.000218201
	LGG_RS04005	--	2.45	6.57	1.42	1.72573e-05	0.00020677
	LGG_RS04500	secG	5.98	15.91	1.41	0.00657921	0.0254964
	LGG_RS10685	--	1.07	2.85	1.41	0.00271884	0.0128294
	LGG_RS11510	SSP1627	0.29	0.77	1.41	0.000528949	0.00360018
	LGG_RS00210	--	0.45	1.19	1.4	0.0141651	0.0461488
	LGG_RS06500	fruA	0.45	1.19	1.4	8.79107e-05	0.000828144
	LGG_RS13090	pepV	0.19	0.5	1.4	0.00438044	0.0186402
	LGG_RS13775	--	0.63	1.66	1.4	5.42135e-05	0.000550855
	LGG_RS03995	--	0.13	0.34	1.39	0.000116237	0.00104936
	LGG_RS04075	--	0.99	2.6	1.39	0.000924377	0.00552501
	LGG_RS12800	--	0.67	1.74	1.38	0.00734258	0.0274687
	LGG_RS02560	--	0.26	0.67	1.37	0.000181073	0.00151868
	LGG_RS05055	map	3	7.74	1.37	3.51998e-05	0.00037818
	LGG_RS07625	gtf1	0.59	1.52	1.37	0.00846363	0.0308632
	LGG_RS09290	nosF	0.54	1.4	1.37	0.000180574	0.00151868
	LGG_RS09815	rfbC	1.31	3.38	1.37	0.000231462	0.00181813
	LGG_RS11040	apbE2	0.73	1.89	1.37	0.000317891	0.00234141
	LGG_RS12630	ydfK	0.19	0.49	1.37	0.00147781	0.00810615
	LGG_RS09565	--	1.38	3.54	1.36	0.000209236	0.00170004
	LGG_RS01370	--	0.27	0.69	1.35	5.80002e-05	0.000580002
	LGG_RS04695	nodI	0.09	0.23	1.35	0.00707242	0.0266884
	LGG_RS05125	cspLA	7.35	18.75	1.35	0.0054612	0.0221515
	LGG_RS07185	--	0.22	0.56	1.35	0.000323249	0.00236746
	LGG_RS10535	pglK	0.71	1.81	1.35	0.000627388	0.00412964
	LGG_RS12455	lemA	0.27	0.69	1.35	5.33011e-05	0.000545602
	LGG_RS01020	--	0.98	2.48	1.34	0.00131549	0.00740321
	LGG_RS01145	--	0.45	1.14	1.34	0.000479646	0.0033167
	LGG_RS01485	--	0.32	0.81	1.34	0.000535271	0.00362423
	LGG_RS02540	ntpR	3.17	8.05	1.34	0.000911513	0.00548596
	LGG_RS06260	mnmA	0.6	1.52	1.34	4.33587e-05	0.000458263
	LGG_RS09165	fic	0.75	1.88	1.33	0.000717881	0.00459727
	LGG_RS05650	atpB	0.04	0.1	1.32	0.000915114	0.00549491
	LGG_RS05955	--	0.43	1.07	1.32	0.00229101	0.0113244
	LGG_RS09200	pycB	0.25	0.62	1.31	0.00177613	0.00931038
	LGG_RS09305	yhcA	0.5	1.24	1.31	0.0015876	0.0084759
	LGG_RS07545	rsmE	0.86	2.12	1.3	0.0100736	0.0352509
	LGG_RS10405	dapX	0.57	1.39	1.29	0.00203731	0.0103457
	LGG_RS13605	--	0.93	2.28	1.29	0.00204312	0.010355
	LGG_RS13625	artM	0.64	1.56	1.29	0.000268968	0.00205079
	LGG_RS00530	--	2.13	5.18	1.28	0.000772174	0.00489672
	LGG_RS03640	--	1.08	2.63	1.28	0.00190619	0.00981404
	LGG_RS05825	sdaAB	0.53	1.29	1.28	0.000140494	0.00123051
	LGG_RS08915	--	0.86	2.09	1.28	0.001705	0.00899187
	LGG_RS03695	--	0.54	1.3	1.27	0.00433213	0.0185255
	LGG_RS08785	yugS	0.12	0.29	1.27	0.000644357	0.00421997
	LGG_RS07745	yceF	0.3	0.72	1.26	0.000687648	0.00443644
	LGG_RS07835	LSEI_1587	1.08	2.58	1.26	0.00279642	0.013124
	LGG_RS09355	dppC	0.18	0.43	1.26	0.000811613	0.00504831
	LGG_RS10430	--	0.38	0.91	1.26	0.00181717	0.00948663
	LGG_RS03650	mutS2	0.37	0.88	1.25	0.000159528	0.00138258
	LGG_RS08190	glcK	2.16	5.12	1.25	9.4126e-05	0.000883493
	LGG_RS11850	rplP	1.04	2.47	1.25	0.000100341	0.000935074
	LGG_RS13510	--	7.93	18.92	1.25	0.00099779	0.00581672
	LGG_RS06530	yqjQ	0.33	0.78	1.24	0.000191707	0.00158235
	LGG_RS12265	--	0.3	0.71	1.24	0.000164337	0.00140552
	LGG_RS03625	LSEI_0786	5.05	11.83	1.23	0.00311274	0.0142485
	LGG_RS03645	--	0.17	0.4	1.23	0.00652403	0.025431
	LGG_RS03780	--	0.34	0.8	1.23	0.000855643	0.00524687
	LGG_RS09960	efp	0.54	1.27	1.23	0.000331109	0.00241745
	LGG_RS14080	yidC	0.51	1.2	1.23	0.000303166	0.00224568
	LGG_RS03710	--	0.24	0.56	1.22	0.0105786	0.0365038
	LGG_RS09195	--	0.18	0.42	1.22	0.00148941	0.00811839
	LGG_RS10530	HI_0664	0.76	1.77	1.22	0.000646414	0.0042228
	LGG_RS13390	MJ0456	0.09	0.21	1.22	0.00243125	0.0117934
	LGG_RS04240	ymfH	0.35	0.81	1.21	0.00122103	0.00696199
	LGG_RS04355	phoU	0.81	1.88	1.21	0.000682296	0.00441286
	LGG_RS04940	yttB	0.76	1.76	1.21	0.00303373	0.0140101
	LGG_RS08930	pbp	0.44	1.02	1.21	0.000934985	0.0055756
	LGG_RS12165	--	0.53	1.23	1.21	0.0115442	0.0392865
	LGG_RS01050	--	1.1	2.53	1.2	0.000549062	0.00370795
	LGG_RS04840	--	0.53	1.22	1.2	0.000487638	0.00336302
	LGG_RS05105	--	0.51	1.17	1.2	0.000961625	0.00567528
	LGG_RS09860	--	2.31	5.29	1.2	0.000840921	0.00517004
	LGG_RS12240	mscL	0.53	1.22	1.2	0.00381276	0.016802
	LGG_RS01220	guaB	3.59	8.19	1.19	0.000888971	0.00541294
	LGG_RS04635	nhaK	0.07	0.16	1.19	0.00133427	0.00747652
	LGG_RS10470	--	0.64	1.46	1.19	0.000667014	0.00433559
	LGG_RS06090	--	0.15	0.34	1.18	0.000788971	0.00494391
	LGG_RS11710	--	0.8	1.81	1.18	0.00952549	0.0336498
	LGG_RS12150	murF	0.6	1.36	1.18	0.000375685	0.00271328
	LGG_RS13740	--	0.35	0.79	1.17	0.00658004	0.0254964
	LGG_RS00365	--	1.93	4.31	1.16	0.00289324	0.0134811
	LGG_RS01090	--	0.26	0.58	1.16	0.0120714	0.0408669
	LGG_RS12375	--	0.53	1.17	1.14	0.00692344	0.0262846
	LGG_RS06045	Ldb0724	0.46	1	1.12	0.00216894	0.0108866
	LGG_RS01055	--	0.37	0.8	1.11	0.00121337	0.00694476
	LGG_RS04095	ytzG	0.62	1.34	1.11	0.00233102	0.0114258
	LGG_RS08125	rplU	1.23	2.65	1.11	0.00107257	0.00621087
	LGG_RS08200	gluP	0.65	1.4	1.11	0.00292495	0.0135559
	LGG_RS10700	--	0.19	0.41	1.11	0.012686	0.0423955
	LGG_RS12045	yugI	0.43	0.93	1.11	0.0109359	0.0373632
	LGG_RS03485	--	1.15	2.47	1.1	0.000517603	0.0035322
	LGG_RS07985	M6_Spy1614	0.61	1.31	1.1	0.0125912	0.0422415
	LGG_RS08070	tlyA	0.28	0.6	1.1	0.00222526	0.0110898
	LGG_RS08345	nadD	0.48	1.03	1.1	0.000835705	0.00517004
	LGG_RS09180	--	0.2	0.43	1.1	0.000779816	0.00492117
	LGG_RS09575	ycaM	0.41	0.88	1.1	0.00757817	0.0281073
	LGG_RS10965	rplA	0.6	1.29	1.1	0.000805293	0.00502101
	LGG_RS12035	hpt	2.02	4.33	1.1	0.0014542	0.0080274
	LGG_RS04390	lgt	0.32	0.68	1.09	0.00120329	0.00690631
	LGG_RS06355	suhB	0.65	1.38	1.09	0.00171325	0.00901709
	LGG_RS07885	trmD	0.3	0.64	1.09	0.00178485	0.00933724
	LGG_RS08985	--	0.08	0.17	1.09	0.00245899	0.0119057
	LGG_RS00930	--	0.36	0.76	1.08	0.00137309	0.0076775
	LGG_RS08000	rpe	0.27	0.57	1.08	0.00147114	0.00809746
	LGG_RS09845	--	2.1	4.44	1.08	0.00188481	0.00974257
	LGG_RS00620	--	1.16	2.42	1.06	0.00223076	0.0110898
	LGG_RS09610	--	0.76	1.59	1.06	0.00616636	0.0243286
	LGG_RS05715	rodA	0.14	0.29	1.05	0.00334334	0.0150915
	LGG_RS11005	--	1.12	2.32	1.05	0.00280629	0.0131466
	LGG_RS08320	--	0.48	0.99	1.04	0.00596622	0.0237552
	LGG_RS10970	rplK	0.58	1.19	1.04	0.00512666	0.0210574
	LGG_RS13630	--	1.58	3.25	1.04	0.00966108	0.0340363
	LGG_RS14060	mnmG	0.51	1.05	1.04	0.00158619	0.0084759
	LGG_RS07795	cdsA	0.26	0.53	1.03	0.00249275	0.0120244
	LGG_RS13530	ribZ	0.77	1.57	1.03	0.0154409	0.0493806
	LGG_RS00810	bglA	0.73	1.48	1.02	0.0147592	0.0476102
	LGG_RS01335	GOX1705	1.57	3.18	1.02	0.00686676	0.0262167
	LGG_RS08790	--	0.39	0.79	1.02	0.00472882	0.019735
	LGG_RS09035	--	0.78	1.58	1.02	0.00747801	0.0278551
	LGG_RS03530	yxjH	1.04	2.09	1.01	0.00278015	0.0130712
Down-regulated TE	LGG_RS06165	divIB	1.52	0.75	-1.02	0.00642334	0.0251138
	LGG_RS06330	pdhB	1.42	0.7	-1.02	0.0118563	0.0402433
	LGG_RS12890	malL	3.69	1.81	-1.03	0.00876351	0.0316799
	LGG_RS09660	wbgU	5.86	2.84	-1.05	0.00650202	0.0253833
	LGG_RS03395	yqgN	0.48	0.23	-1.06	0.00850724	0.0309354
	LGG_RS03465	fpaP	1	0.48	-1.06	0.0105424	0.0364983
	LGG_RS04400	trxB	3.61	1.73	-1.06	0.00861725	0.0312917
	LGG_RS00025	gyrB	2.46	1.17	-1.07	0.00413516	0.0177999
	LGG_RS06685	yfmR	0.8	0.38	-1.07	0.00657567	0.0254964
	LGG_RS07740	truB	0.82	0.39	-1.07	0.00704122	0.0266093
	LGG_RS08660	bceR	1.78	0.85	-1.07	0.0104533	0.0363349
	LGG_RS01040	--	1.35	0.64	-1.08	0.0142357	0.0462116
	LGG_RS06825	ppaC	3.08	1.46	-1.08	0.00481335	0.0199597
	LGG_RS07995	thiN	0.38	0.18	-1.08	0.0141421	0.0461488
	LGG_RS08165	speF	1.98	0.93	-1.09	0.00880789	0.0316799
	LGG_RS04175	apbE2	0.73	0.34	-1.1	0.00879507	0.0316799
	LGG_RS08270	--	2.04	0.95	-1.1	0.0146317	0.0473164
	LGG_RS10160	accD	0.3	0.14	-1.1	0.0152952	0.0490351
	LGG_RS03380	--	2.79	1.29	-1.11	0.010787	0.0369515
	LGG_RS05175	ltaS1	1.06	0.49	-1.11	0.0126391	0.0423145
	LGG_RS10355	THNSL1	1.09	0.5	-1.12	0.0104868	0.0363543
	LGG_RS13885	--	1.7	0.78	-1.12	0.00880944	0.0316799
	LGG_RS00385	opuCB	1.05	0.48	-1.13	0.00565923	0.0228124
	LGG_RS03440	msbA	1.68	0.77	-1.13	0.0123892	0.0416712
	LGG_RS04475	tpiA	1.79	0.82	-1.13	0.00410436	0.0177265
	LGG_RS11555	mco	0.94	0.43	-1.13	0.00674378	0.0258611
	LGG_RS01400	ykwC	2.71	1.23	-1.14	0.00880461	0.0316799
	LGG_RS02920	nhaK	0.42	0.19	-1.14	0.0153493	0.049148
	LGG_RS05165	--	0.75	0.34	-1.14	0.0123184	0.0414868
	LGG_RS09010	melB	1.57	0.71	-1.14	0.00899488	0.0320805
	LGG_RS12225	DDB_G0272484	0.86	0.39	-1.14	0.00751532	0.027954
	LGG_RS01185	rsmG	0.71	0.32	-1.15	0.00432924	0.0185255
	LGG_RS07765	--	0.51	0.23	-1.15	0.00703554	0.0266093
	LGG_RS02130	--	3.44	1.54	-1.16	0.00262562	0.0124801
	LGG_RS03755	--	1.03	0.46	-1.16	0.00819079	0.0300792
	LGG_RS04680	yloB	1.39	0.62	-1.16	0.00202922	0.0103248
	LGG_RS06140	--	0.58	0.26	-1.16	0.00519878	0.0213199
	LGG_RS08580	LCABL_19440	2.74	1.23	-1.16	0.0107692	0.0369394
	LGG_RS11890	rpsJ	1.39	0.62	-1.16	0.00190394	0.00981404
	LGG_RS06775	xerC	0.18	0.08	-1.17	0.015295	0.0490351
	LGG_RS07225	sigA	2.82	1.25	-1.17	0.00251216	0.0120956
	LGG_RS08025	fmt	1.8	0.8	-1.17	0.00263218	0.0124884
	LGG_RS09800	ywqE	0.88	0.39	-1.17	0.00311871	0.0142507
	LGG_RS04440	--	0.84	0.37	-1.18	0.00727978	0.027273
	LGG_RS07145	--	0.25	0.11	-1.18	0.0107165	0.0368558
	LGG_RS12075	ldh	3.55	1.57	-1.18	0.00123476	0.00702487
	LGG_RS13210	Os03g0216600	1.81	0.8	-1.18	0.00848779	0.0309079
	LGG_RS03310	lctO	1.91	0.84	-1.19	0.00663448	0.0255844
	LGG_RS12400	yxkA	2.06	0.9	-1.19	0.00424284	0.0182036
	LGG_RS03210	--	1.38	0.6	-1.2	0.00166833	0.00883436
	LGG_RS09175	--	5.37	2.34	-1.2	0.0041419	0.0177999
	LGG_RS11375	--	1.74	0.76	-1.2	0.00138739	0.00772263
	LGG_RS12380	ldh1	2.36	1.03	-1.2	0.0044731	0.01888
	LGG_RS04860	--	1.11	0.48	-1.21	0.00461543	0.019355
	LGG_RS04555	--	2.02	0.87	-1.22	0.00121533	0.00694476
	LGG_RS08380	CRYZ	1.96	0.84	-1.22	0.0109147	0.0373397
	LGG_RS13540	iolS	1.33	0.57	-1.22	0.00153636	0.00830834
	LGG_RS07075	pepO	2.25	0.96	-1.23	0.00154795	0.00833265
	LGG_RS09585	hflX	1.01	0.43	-1.23	0.00210366	0.0106042
	LGG_RS13315	MSMEG_2408	2.33	0.99	-1.23	0.00403869	0.0175302
	LGG_RS02905	dkgB	1.86	0.79	-1.24	0.00212111	0.0106671
	LGG_RS07070	rbcR	0.73	0.31	-1.24	0.00139007	0.00772263
	LGG_RS09765	ilvE	2.13	0.9	-1.24	0.00288295	0.0134572
	LGG_RS10955	ssdA	2.01	0.85	-1.24	0.00487078	0.0201656
	LGG_RS11840	rpsQ	2.53	1.07	-1.24	0.00739852	0.0276381
	LGG_RS12395	--	1.35	0.57	-1.24	0.00193971	0.00994726
	LGG_RS00940	rarA	0.62	0.26	-1.25	0.00937237	0.0332444
	LGG_RS00980	yusP	1	0.42	-1.25	0.00305657	0.014071
	LGG_RS06030	rpsD	1.26	0.53	-1.25	0.001581	0.00847547
	LGG_RS12040	tilS	1.07	0.45	-1.25	0.00106734	0.0061944
	LGG_RS00550	dapH	0.79	0.33	-1.26	0.00231582	0.0113821
	LGG_RS01190	noc	1.29	0.54	-1.26	0.000953054	0.00565714
	LGG_RS01445	lepB	1.22	0.51	-1.26	0.00222844	0.0110898
	LGG_RS03205	--	0.86	0.36	-1.26	0.00186517	0.00967938
	LGG_RS04720	--	1.56	0.65	-1.26	0.000739145	0.00472181
	LGG_RS08035	coaBC	2	0.83	-1.27	0.00202706	0.0103248
	LGG_RS12105	--	0.41	0.17	-1.27	0.0135148	0.0443667
	LGG_RS05975	--	1.73	0.71	-1.28	0.0148658	0.0478949
	LGG_RS13570	--	0.51	0.21	-1.28	0.0036419	0.0162976
	LGG_RS11855	rpsC	8.65	3.53	-1.29	0.00131488	0.00740321
	LGG_RS09690	--	1.48	0.6	-1.3	0.00148504	0.00811155
	LGG_RS01395	--	0.47	0.19	-1.31	0.00458137	0.0192432
	LGG_RS06025	Dna2	4.16	1.68	-1.31	0.00218569	0.0109495
	LGG_RS06990	pyrC	1.76	0.71	-1.31	0.00305775	0.014071
	LGG_RS11725	--	20.55	8.3	-1.31	0.0133949	0.0441964
	LGG_RS02350	yidA	0.8	0.32	-1.32	0.00154282	0.00832228
	LGG_RS09315	--	0.65	0.26	-1.32	0.00542668	0.0220606
	LGG_RS04590	ung	3.41	1.35	-1.34	0.00137776	0.00768706
	LGG_RS06765	topA	2.12	0.84	-1.34	0.000750689	0.00477211
	LGG_RS10175	accB	1.93	0.76	-1.34	0.0126455	0.0423145
	LGG_RS13415	zosA	0.81	0.32	-1.34	0.00160197	0.00852662
	LGG_RS00160	--	0.89	0.35	-1.35	0.010069	0.0352509
	LGG_RS03095	galM	2.98	1.17	-1.35	0.000496174	0.00340384
	LGG_RS04835	LCABL_12100	1.15	0.45	-1.35	0.00741448	0.027658
	LGG_RS08040	rpoZ	5.73	2.25	-1.35	0.00632507	0.0248325
	LGG_RS12190	SH2010	1.48	0.58	-1.35	0.00254113	0.0121899
	LGG_RS12495	opuCA	0.97	0.38	-1.35	0.00056354	0.0037763
	LGG_RS01835	pbpC	2.08	0.81	-1.36	0.000509071	0.00348312
	LGG_RS06160	murG	0.87	0.34	-1.36	0.000201124	0.00164441
	LGG_RS07140	aspB	2.42	0.94	-1.36	0.000216283	0.00173026
	LGG_RS09060	--	7.75	3.01	-1.36	0.00608836	0.024094
	LGG_RS09745	glgA	1.59	0.62	-1.36	0.00362847	0.0162656
	LGG_RS06470	clpX	2.25	0.87	-1.37	0.00030187	0.00224246
	LGG_RS11515	yqiG	3.33	1.29	-1.37	0.000839306	0.00517004
	LGG_RS12220	lipL	0.8	0.31	-1.37	0.00345729	0.0155788
	LGG_RS13430	htrA	3.02	1.17	-1.37	0.000293257	0.00219731
	LGG_RS05930	desR	1.38	0.53	-1.38	0.0123122	0.0414868
	LGG_RS05935	yvfT	0.26	0.1	-1.38	0.00623136	0.0245106
	LGG_RS08825	lp_3226	0.91	0.35	-1.38	0.000577094	0.00383746
	LGG_RS11070	hepT	0.83	0.32	-1.38	0.000377327	0.00271759
	LGG_RS13230	GDE1	1.92	0.74	-1.38	0.000782932	0.00492887
	LGG_RS00270	kdgK	0.55	0.21	-1.39	0.00608048	0.024094
	LGG_RS00280	uxuA	2.2	0.84	-1.39	0.000908357	0.00548596
	LGG_RS02015	tal	5.6	2.13	-1.39	0.00506711	0.0208787
	LGG_RS03505	dkgB	1.02	0.39	-1.39	0.00022031	0.0017517
	LGG_RS06220	SAB1262	4.45	1.7	-1.39	0.000428774	0.00300489
	LGG_RS00730	mccF	1.69	0.64	-1.4	0.00102659	0.00597124
	LGG_RS02020	degA	9.52	3.6	-1.4	0.00939021	0.0332623
	LGG_RS08310	--	5.87	2.23	-1.4	0.000188106	0.00156254
	LGG_RS10145	azoB	1.03	0.39	-1.4	0.00653485	0.025435
	LGG_RS11545	--	0.37	0.14	-1.4	0.000387216	0.00277345
	LGG_RS03355	--	1.46	0.55	-1.41	0.00238151	0.0116171
	LGG_RS04605	yhaQ	1.62	0.61	-1.41	0.00233531	0.0114258
	LGG_RS13715	HI_1698	5.8	2.19	-1.41	0.00918959	0.0326853
	LGG_RS13070	prt	1.77	0.66	-1.42	0.00210453	0.0106042
	LGG_RS01595	agaS	6.24	2.31	-1.43	0.00126594	0.00717092
	LGG_RS02415	dhaM	1.54	0.57	-1.43	0.0046386	0.0194209
	LGG_RS02820	metF	0.94	0.35	-1.43	0.00458109	0.0192432
	LGG_RS08815	--	1.24	0.46	-1.43	0.00147312	0.00809746
	LGG_RS10850	recR	2.39	0.89	-1.43	0.000390663	0.00279045
	LGG_RS00555	lysA	1.06	0.39	-1.44	0.000630301	0.00413834
	LGG_RS05860	--	2.49	0.92	-1.44	0.00182728	0.00950187
	LGG_RS01085	ykuP	1.48	0.54	-1.45	0.00319767	0.0145349
	LGG_RS05115	--	0.41	0.15	-1.45	0.00260881	0.0124229
	LGG_RS11865	rpsS	1.67	0.61	-1.45	0.000534982	0.00362423
	LGG_RS01405	yjbG	1.75	0.63	-1.47	0.000205791	0.00167729
	LGG_RS03150	lacR	1.61	0.58	-1.47	0.0015801	0.00847547
	LGG_RS03385	ywrF	0.25	0.09	-1.47	0.00531209	0.0217161
	LGG_RS04825	--	1.86	0.67	-1.47	0.000411417	0.00290675
	LGG_RS10665	--	1.94	0.7	-1.47	0.000164294	0.00140552
	LGG_RS02690	cysK	5.09	1.82	-1.48	0.000140478	0.00123051
	LGG_RS04955	pepO	1.93	0.69	-1.48	0.000295315	0.00220637
	LGG_RS06835	bceB	0.89	0.32	-1.48	0.00186886	0.00967938
	LGG_RS13940	mtlA	1.06	0.38	-1.48	0.00720043	0.0270928
	LGG_RS13970	--	4.57	1.64	-1.48	0.00588146	0.0235206
	LGG_RS02710	metB	3.54	1.26	-1.49	0.0122426	0.0413925
	LGG_RS03410	--	0.56	0.2	-1.49	0.00290812	0.013502
	LGG_RS12670	--	2.36	0.84	-1.49	0.00117169	0.0067398
	LGG_RS13275	murQ	3.22	1.15	-1.49	0.00436649	0.0186113
	LGG_RS14620	--	38.87	13.81	-1.49	0.00761428	0.0282011
	LGG_RS12345	msbA	0.65	0.23	-1.5	0.000113624	0.00103657
	LGG_RS02955	LSEI_0651	3.01	1.06	-1.51	0.0152103	0.0488834
	LGG_RS07105	LCABL_17010	0.37	0.13	-1.51	0.00588242	0.0235206
	LGG_RS07170	mvd1	2.57	0.9	-1.51	0.00663548	0.0255844
	LGG_RS11225	yjdJ	3.97	1.39	-1.51	0.000939165	0.00558771
	LGG_RS00285	por	1.46	0.51	-1.52	0.00362246	0.0162656
	LGG_RS00290	--	0.89	0.31	-1.52	0.0155202	0.0495004
	LGG_RS02645	--	3.06	1.07	-1.52	0.00194581	0.00995885
	LGG_RS07695	--	1.87	0.65	-1.52	0.000446159	0.00311831
	LGG_RS11405	KAB1	1.95	0.68	-1.52	0.000277852	0.00210909
	LGG_RS08730	purK	6.91	2.4	-1.53	0.000129944	0.00115308
	LGG_RS13700	gvpN	0.98	0.34	-1.53	0.00676085	0.0258884
	LGG_RS02345	npr	1.05	0.36	-1.54	0.0012791	0.00722968
	LGG_RS02470	--	1.4	0.48	-1.54	0.000349184	0.00252891
	LGG_RS10050	--	4.76	1.64	-1.54	0.00661442	0.0255844
	LGG_RS03345	SERP1785	3.2	1.09	-1.55	0.000256883	0.00198779
	LGG_RS06480	--	9.72	3.31	-1.55	0.00446488	0.0188759
	LGG_RS07025	--	0.56	0.19	-1.56	0.0087411	0.031653
	LGG_RS09400	--	2.6	0.88	-1.56	0.000134316	0.00118783
	LGG_RS13565	--	2.04	0.69	-1.56	0.00386448	0.0169438
	LGG_RS13935	mtlR	0.97	0.33	-1.56	0.000210935	0.0017032
	LGG_RS01965	lacR	5.09	1.72	-1.57	0.00376123	0.0166713
	LGG_RS03250	acuI	1.04	0.35	-1.57	0.000417432	0.00294126
	LGG_RS05415	--	3.29	1.11	-1.57	0.00599763	0.0238438
	LGG_RS13220	pncA	1.37	0.46	-1.57	0.00379506	0.0167524
	LGG_RS00645	--	1.26	0.42	-1.58	0.0070219	0.0266093
	LGG_RS02430	--	3.03	1.01	-1.58	0.000182887	0.00152406
	LGG_RS04460	cggR	0.09	0.03	-1.58	0.00227164	0.01125
	LGG_RS06340	pdhD	4.18	1.4	-1.58	1.74509e-05	0.00020813
	LGG_RS06965	pyrE	3.46	1.16	-1.58	0.000113538	0.00103657
	LGG_RS09270	--	0.99	0.33	-1.58	0.000394796	0.00281224
	LGG_RS00030	gyrA	1.24	0.41	-1.6	1.0833e-05	0.000139435
	LGG_RS04155	--	4.19	1.37	-1.61	0.00714936	0.0269396
	LGG_RS09555	gpmA	1.74	0.57	-1.61	5.42876e-05	0.000550855
	LGG_RS10675	--	2.66	0.87	-1.61	8.11819e-05	0.000776004
	LGG_RS01100	gyaR	2.7	0.88	-1.62	7.54286e-05	0.000729049
	LGG_RS03370	lexA	2.09	0.68	-1.62	4.21697e-05	0.000449349
	LGG_RS03795	yutD	1.69	0.55	-1.62	0.000173293	0.00146286
	LGG_RS09350	--	2.65	0.86	-1.62	0.0043654	0.0186113
	LGG_RS09530	MJ1275	1.32	0.43	-1.62	0.00047705	0.00330755
	LGG_RS13235	arsC	2.03	0.66	-1.62	0.00633228	0.0248325
	LGG_RS03685	yslB	0.93	0.3	-1.63	0.000259509	0.0020015
	LGG_RS04945	yidA	1.96	0.63	-1.64	0.000115577	0.00104936
	LGG_RS07405	--	15.28	4.91	-1.64	0.000262828	0.00200986
	LGG_RS10980	nylA	2.49	0.8	-1.64	0.000115916	0.00104936
	LGG_RS11720	macB2	0.97	0.31	-1.65	0.0100872	0.035251
	LGG_RS07090	ddh	1.52	0.48	-1.66	0.000216171	0.00173026
	LGG_RS10480	ackA	2.12	0.67	-1.66	4.38589e-05	0.000461673
	LGG_RS10625	teaD	6.56	2.07	-1.66	9.80922e-06	0.00012752
	LGG_RS11190	--	1.74	0.55	-1.66	0.00066028	0.00430258
	LGG_RS03520	--	1.94	0.61	-1.67	0.000743197	0.00473606
	LGG_RS08030	priA	1.27	0.4	-1.67	2.14589e-05	0.000248677
	LGG_RS11240	--	1.11	0.35	-1.67	0.00222797	0.0110898
	LGG_RS06810	pflB	3.8	1.19	-1.68	0.000260779	0.0020015
	LGG_RS09120	--	0.32	0.1	-1.68	7.41284e-05	0.000719156
	LGG_RS09490	coaA	6.85	2.14	-1.68	7.33033e-05	0.000713814
	LGG_RS13865	--	2.34	0.73	-1.68	0.00260185	0.0124125
	LGG_RS05615	murC	0.71	0.22	-1.69	1.56485e-05	0.000191015
	LGG_RS04585	ywpJ	2.28	0.7	-1.7	1.69196e-05	0.000203662
	LGG_RS02570	yvgN	12.02	3.67	-1.71	0.000141175	0.00123173
	LGG_RS04950	RPA4569	2.06	0.63	-1.71	3.41544e-05	0.000371743
	LGG_RS09580	dagK	0.59	0.18	-1.71	0.00366926	0.0163919
	LGG_RS13875	--	7.99	2.44	-1.71	0.0139011	0.0454626
	LGG_RS02490	--	2.94	0.89	-1.72	0.000868967	0.00530355
	LGG_RS00545	LCABL_00980	1.43	0.43	-1.73	6.06758e-06	8.39133e-05
	LGG_RS01565	--	1.06	0.32	-1.73	0.0040777	0.0176406
	LGG_RS03085	galT	1.53	0.46	-1.73	4.44314e-06	6.45372e-05
	LGG_RS03760	pepV	3.13	0.94	-1.74	1.27543e-05	0.000159429
	LGG_RS05765	sufU	1.5	0.45	-1.74	0.000102568	0.000949031
	LGG_RS09405	--	6.19	1.85	-1.74	0.000171634	0.00145357
	LGG_RS10635	iphP	1.57	0.47	-1.74	4.98853e-06	7.08753e-05
	LGG_RS05665	atpH	0.47	0.14	-1.75	3.14857e-06	4.84395e-05
	LGG_RS02950	cah	0.71	0.21	-1.76	0.00116466	0.00671421
	LGG_RS00400	--	1.6	0.47	-1.77	0.00689099	0.0262614
	LGG_RS10570	cas9	10.42	3.06	-1.77	3.44476e-05	0.000373182
	LGG_RS11535	mntH	0.17	0.05	-1.77	1.2179e-05	0.000153715
	LGG_RS14365	--	18.65	5.45	-1.77	0.0019162	0.00984609
	LGG_RS14940	--	1.71	0.5	-1.77	0.00725168	0.0272069
	LGG_RS00535	dapB	1.17	0.34	-1.78	4.39103e-06	6.41386e-05
	LGG_RS01555	nox	3.64	1.06	-1.78	0.00142332	0.00789045
	LGG_RS05810	gshAB	2.88	0.84	-1.78	4.92773e-06	7.03962e-05
	LGG_RS11540	pma1	0.24	0.07	-1.78	0.000234164	0.00183381
	LGG_RS12985	--	1.13	0.33	-1.78	0.00526165	0.0215438
	LGG_RS09695	zurR	4.26	1.22	-1.8	0.000197868	0.00162289
	LGG_RS10035	frlD	1.94	0.55	-1.82	3.66255e-06	5.44151e-05
	LGG_RS11080	MJ0912	2.47	0.7	-1.82	1.98328e-05	0.000231234
	LGG_RS12945	dgaF	3.14	0.89	-1.82	8.32846e-05	0.000793187
	LGG_RS03975	--	0.39	0.11	-1.83	0.000162645	0.00140025
	LGG_RS05235	--	1.22	0.34	-1.84	0.00148118	0.00810749
	LGG_RS02815	--	0.47	0.13	-1.85	0.0022529	0.0111785
	LGG_RS09300	--	1.3	0.36	-1.85	0.000711633	0.00456851
	LGG_RS09540	--	2.48	0.69	-1.85	2.17094e-06	3.50587e-05
	LGG_RS01655	gatB	6.65	1.83	-1.86	0.00465573	0.0194613
	LGG_RS04450	clpP	7.5	2.06	-1.86	0.000228305	0.00179877
	LGG_RS03525	--	0.95	0.26	-1.87	0.00396693	0.0173054
	LGG_RS00390	opuCA	1.55	0.42	-1.88	2.90051e-06	4.54297e-05
	LGG_RS08135	--	1.99	0.54	-1.88	6.43249e-06	8.84893e-05
	LGG_RS08895	--	3.13	0.85	-1.88	0.00894204	0.0319798
	LGG_RS09615	spsK	3.76	1.02	-1.88	3.13842e-07	6.68843e-06
	LGG_RS12415	gppA	0.7	0.19	-1.88	6.64645e-06	9.09514e-05
	LGG_RS12570	ycsE	2.65	0.72	-1.88	1.50046e-06	2.53325e-05
	LGG_RS07045	--	6.45	1.74	-1.89	8.44126e-05	0.000800996
	LGG_RS05815	--	1.6	0.43	-1.9	0.000594694	0.00393436
	LGG_RS12160	--	2.32	0.62	-1.9	0.00440442	0.0186811
	LGG_RS12340	msbA	3.51	0.94	-1.9	4.5264e-07	9.41491e-06
	LGG_RS04105	nnrD	0.6	0.16	-1.91	1.38906e-06	2.40771e-05
	LGG_RS10985	cobO	3.56	0.95	-1.91	4.53883e-05	0.000473935
	LGG_RS05870	ycbM	3.48	0.91	-1.94	0.000210388	0.0017032
	LGG_RS06325	pdhA	4.26	1.11	-1.94	0.000296909	0.00221193
	LGG_RS12695	lpdC	3.03	0.79	-1.94	0.00882355	0.0316868
	LGG_RS05915	--	5.78	1.5	-1.95	0.00145079	0.00802565
	LGG_RS07020	fhs	3.12	0.81	-1.95	6.55918e-08	1.72261e-06
	LGG_RS08055	--	1.85	0.48	-1.95	0.00372772	0.0165677
	LGG_RS10915	mdtG	1.01	0.26	-1.96	6.06234e-07	1.1941e-05
	LGG_RS08065	argR2	3.25	0.83	-1.97	9.66586e-06	0.000126925
	LGG_RS02405	sph	1.7	0.43	-1.98	1.81125e-06	3.01875e-05
	LGG_RS12435	ustM	1.71	0.43	-1.99	1.16518e-05	0.000149235
	LGG_RS00935	--	3.39	0.85	-2	0.00285245	0.0133388
	LGG_RS10960	--	0.8	0.2	-2	0.000213613	0.00171948
	LGG_RS02190	--	1.09	0.27	-2.01	0.000286864	0.00216816
	LGG_RS06410	rpsT	2.96	0.73	-2.02	4.70667e-07	9.71218e-06
	LGG_RS10475	hepT	0.65	0.16	-2.02	0.000250175	0.00194747
	LGG_RS13860	--	15.53	3.84	-2.02	0.0118875	0.0402965
	LGG_RS13880	RF_0471	0.61	0.15	-2.02	0.000191668	0.00158235
	LGG_RS01070	--	14.65	3.57	-2.04	0.00153704	0.00830834
	LGG_RS02195	yloB	2.87	0.7	-2.04	5.56317e-06	7.79687e-05
	LGG_RS06970	pyrF	1.69	0.41	-2.04	0.000181768	0.0015196
	LGG_RS02420	dhaL-1	1.96	0.47	-2.06	4.234e-07	8.94992e-06
	LGG_RS09160	rpmG	20.56	4.91	-2.07	0.000289208	0.00217954
	LGG_RS02650	rbcR	2.87	0.68	-2.08	0.00150192	0.00816945
	LGG_RS13975	macB	12.04	2.85	-2.08	0.000226992	0.00179781
	LGG_RS03535	luxS	2.59	0.61	-2.09	5.2223e-05	0.000536679
	LGG_RS02895	expZ	2.45	0.57	-2.1	5.86833e-05	0.000584585
	LGG_RS06300	--	72.6	16.9	-2.1	0.00315533	0.0143927
	LGG_RS09755	glgC	13.39	3.09	-2.12	1.30756e-05	0.000162664
	LGG_RS01585	pmi	3.54	0.81	-2.13	9.10458e-08	2.15311e-06
	LGG_RS00375	opuCD	1.67	0.38	-2.14	1.18583e-08	3.80636e-07
	LGG_RS02685	cysE	1.98	0.45	-2.14	3.25899e-08	9.62883e-07
	LGG_RS02135	--	5.6	1.26	-2.15	5.01574e-09	1.76229e-07
	LGG_RS15215	--	19.64	4.42	-2.15	0.00692498	0.0262846
	LGG_RS03500	nrdI	9.54	2.14	-2.16	1.96425e-06	3.21198e-05
	LGG_RS07655	--	1.34	0.3	-2.16	0.00548517	0.0221795
	LGG_RS08370	--	9.58	2.15	-2.16	1.47817e-06	2.51193e-05
	LGG_RS02870	ldh1	2.19	0.48	-2.19	1.84591e-06	3.05691e-05
	LGG_RS06975	pyrD	1.1	0.24	-2.2	1.14754e-07	2.66393e-06
	LGG_RS10660	--	1.15	0.25	-2.2	5.87079e-06	8.16259e-05
	LGG_RS06875	fahd2	0.83	0.18	-2.21	1.50261e-07	3.427e-06
	LGG_RS11280	--	2.71	0.58	-2.22	3.16745e-08	9.46595e-07
	LGG_RS04110	--	1.08	0.23	-2.23	1.00955e-05	0.000130588
	LGG_RS03375	--	1.65	0.35	-2.24	2.5362e-05	0.000286701
	LGG_RS08020	rsmB	2.51	0.53	-2.24	8.80763e-09	2.89871e-07
	LGG_RS11245	--	0.86	0.18	-2.26	3.24047e-05	0.000357001
	LGG_RS00340	mmpL9	0.82	0.17	-2.27	1.74086e-08	5.45328e-07
	LGG_RS02525	EF_1511	7.6	1.58	-2.27	0.00838499	0.0307056
	LGG_RS10250	--	7.27	1.51	-2.27	3.49963e-06	5.22933e-05
	LGG_RS15310	rpsZ	11.25	2.34	-2.27	0.000140562	0.00123051
	LGG_RS03005	--	12.36	2.52	-2.29	0.00207366	0.0104893
	LGG_RS03570	ADH2	3.38	0.68	-2.31	2.74696e-09	1.03509e-07
	LGG_RS13080	nagK	1.3	0.26	-2.32	0.000331934	0.00241745
	LGG_RS00320	yhcA	3.22	0.64	-2.33	1.64452e-05	0.000199801
	LGG_RS14890	--	5.77	1.14	-2.34	0.00124786	0.00708391
	LGG_RS14665	--	32.84	6.25	-2.39	0.00061203	0.00403878
	LGG_RS03305	drgA	5.79	1.09	-2.41	1.42189e-06	2.43217e-05
	LGG_RS00380	opuCC	1.02	0.19	-2.42	4.08966e-10	1.8333e-08
	LGG_RS06130	mraZ	0.59	0.11	-2.42	8.05556e-08	1.95743e-06
	LGG_RS08645	--	4.46	0.83	-2.43	1.09875e-10	5.49374e-09
	LGG_RS09325	--	1.31	0.24	-2.45	0.00453424	0.019107
	LGG_RS03365	--	10.32	1.84	-2.49	2.27827e-06	3.65648e-05
	LGG_RS13845	--	0.56	0.1	-2.49	2.52706e-06	4.03089e-05
	LGG_RS14095	--	208.76	36.47	-2.52	2.55566e-05	0.00028765
	LGG_RS12440	PSPA7_5587	2.49	0.43	-2.53	2.45114e-07	5.26692e-06
	LGG_RS13425	--	4.6	0.78	-2.56	0.00042174	0.00296358
	LGG_RS12325	--	3.97	0.67	-2.57	1.11211e-12	9.97064e-11
	LGG_RS03425	tpx	3.18	0.53	-2.58	1.97481e-05	0.000231234
	LGG_RS08180	--	32.85	5.48	-2.58	0.000166479	0.00141917
	LGG_RS01075	--	0.79	0.13	-2.6	3.40039e-05	0.000371743
	LGG_RS05900	--	9.66	1.59	-2.6	0.00290749	0.013502
	LGG_RS04850	dinB	1.23	0.2	-2.62	4.48401e-06	6.4769e-05
	LGG_RS12610	OCC_04335	2.09	0.34	-2.62	1.31117e-13	1.42044e-11
	LGG_RS13270	ybbE	1.56	0.25	-2.64	5.17745e-05	0.000534181
	LGG_RS10445	--	3.65	0.58	-2.65	0.00253618	0.0121887
	LGG_RS12560	uvrA	1.19	0.19	-2.65	1.27912e-11	8.75188e-10
	LGG_RS13310	nrnA	11.02	1.73	-2.67	4.46603e-11	2.58037e-09
	LGG_RS03325	--	2.31	0.36	-2.68	3.12774e-08	9.45596e-07
	LGG_RS09110	--	8.49	1.32	-2.69	0.000672417	0.00435981
	LGG_RS01940	IS1086	64.95	9.97	-2.7	2.51713e-05	0.000285788
	LGG_RS01785	degA	0.66	0.1	-2.72	8.69309e-06	0.000116505
	LGG_RS02935	--	4.79	0.69	-2.8	0.00588921	0.0235206
	LGG_RS08680	copY	3.49	0.5	-2.8	3.19562e-05	0.000353557
	LGG_RS12170	--	2.68	0.38	-2.82	1.86716e-06	3.07255e-05
	LGG_RS06865	--	1.59	0.22	-2.85	1.04267e-07	2.4423e-06
	LGG_RS00195	lacA	8.17	1.1	-2.89	1.4172e-11	9.448e-10
	LGG_RS11715	--	2.61	0.35	-2.9	1.29312e-08	4.10012e-07
	LGG_RS08365	--	6.18	0.81	-2.93	1.21173e-06	2.15787e-05
	LGG_RS13815	--	40.17	5.28	-2.93	3.49068e-09	1.29654e-07
	LGG_RS03290	pucR	0.69	0.09	-2.94	3.25823e-06	4.92524e-05
	LGG_RS07085	--	0.39	0.05	-2.96	3.98936e-09	1.42087e-07
	LGG_RS00670	zosA	0.72	0.09	-3	8.66506e-11	4.49849e-09
	LGG_RS05945	yvfR	5.41	0.66	-3.04	0.000894464	0.00543366
	LGG_RS00345	--	0.84	0.1	-3.07	6.17227e-07	1.20661e-05
	LGG_RS08695	purN	1.8	0.21	-3.1	7.42757e-08	1.8933e-06
	LGG_RS10135	rbsR	2.04	0.23	-3.15	7.00661e-07	1.34942e-05
	LGG_RS05505	--	2.25	0.25	-3.17	8.88178e-16	1.53951e-13
	LGG_RS13205	--	0.72	0.08	-3.17	0.000909481	0.00548596
	LGG_RS08675	copB	2.82	0.3	-3.23	7.14456e-09	2.39797e-07
	LGG_RS13820	--	3.78	0.39	-3.28	4.84258e-11	2.73711e-09
	LGG_RS15105	--	605.1	58.01	-3.38	2.10293e-07	4.59464e-06
	LGG_RS02510	--	5.7	0.54	-3.4	0.000292362	0.00219694
	LGG_RS08305	--	3.93	0.36	-3.45	5.53868e-08	1.51585e-06
	LGG_RS09710	ykfC	1.53	0.14	-3.45	0	0
	LGG_RS05280	--	3.09	0.28	-3.46	1.00955e-11	7.09412e-10
	LGG_RS08685	purD	15.22	1.37	-3.47	1.11022e-16	2.06184e-14
	LGG_RS00100	IS1086	7.22	0.62	-3.54	0.00478465	0.0198724
	LGG_RS01985	IS1086	7.22	0.62	-3.54	0.00478465	0.0198724
	LGG_RS02145	IS1086	7.22	0.62	-3.54	0.00478465	0.0198724
	LGG_RS05310	--	7.73	0.66	-3.55	0.000381071	0.00273698
	LGG_RS13855	--	104.93	8.93	-3.55	1.18167e-05	0.000150606
	LGG_RS07670	--	48.55	4.01	-3.6	1.78091e-12	1.44699e-10
	LGG_RS05285	--	3.53	0.28	-3.66	1.3217e-05	0.000163639
	LGG_RS05290	--	1.55	0.11	-3.82	1.41842e-06	2.43217e-05
	LGG_RS09330	MJ1023	3.93	0.27	-3.86	3.03918e-11	1.8814e-09
	LGG_RS05500	--	29.14	1.95	-3.9	4.99602e-07	1.02281e-05
	LGG_RS05270	--	11.62	0.76	-3.93	0.000122113	0.00109481
	LGG_RS13835	--	17.33	0.98	-4.14	4.95504e-12	3.68088e-10
	LGG_RS08870	galM	13.7	0.73	-4.23	0	0
	LGG_RS08690	purH	22.29	1.1	-4.34	2.22045e-15	3.20731e-13
	LGG_RS12870	--	5.17	0.25	-4.37	7.22089e-13	7.22089e-11
	LGG_RS15385	--	20.22	0.97	-4.38	3.37537e-08	9.86064e-07
	LGG_RS05260	--	10.02	0.2	-5.65	0	0
	LGG_RS05355	--	2787	5.3	-9.04	0.00672997	0.0258462
	LGG_RS15030	--	16242	12.58	-10.33	0.000569549	0.00380487
	LGG_RS14130	--	3756	2.83	-10.37	0.00201885	0.0103124
	LGG_RS13830	--	13181	3.95	-11.7	1.22265e-06	2.1625e-05
	LGG_RS05995	--	903	0.25	-11.82	1.08413e-12	9.97064e-11
	LGG_RS05250	--	4417	0.75	-12.52	5.803e-09	1.98524e-07
	LGG_RS05265	--	1227	0.13	-13.2	7.58354e-07	1.43921e-05
